# Supplementary material for: Strigolactones promote flowering by inducing the miR319-LA-SFT module in tomato
Source: PubMed Central journal article supplement — Proc Natl Acad Sci U S A. 2024 May 3;121(19):e2316371121. doi: 10.1073/pnas.2316371121 (PMC11087791; doi:10.1073/pnas.2316371121), 2024-05-03
Supplement: pnas.2316371121.sapp.pdf [file pnas.2316371121.sapp.pdf]

1

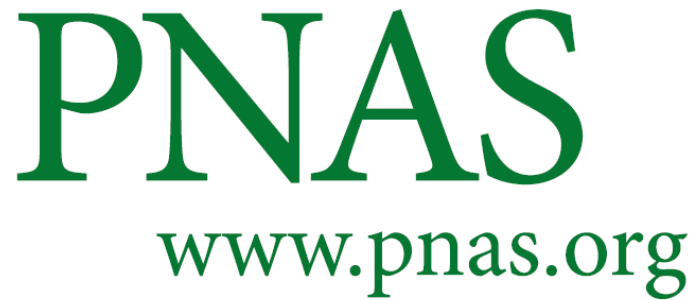

2

3

4

5

6 **Supplementary Information for**

7 Strigolactones promote flowering by inducing the miR319-*LA-SFT*  
8 module in tomato

9

10 Ivan Visentin, Leticia Frizzo Ferigolo, Giulia Russo, Paolo Korwin Krukowski, Caterina  
11 Capezzali, Danuše Tarkowská, Francesco Gresta, Eleonora Deva, Fabio Tebaldi Silveira  
12 Nogueira, Andrea Schubert, Francesca Cardinale\*

13

14 \*Francesca Cardinale, DISAFA PlantStressLab, largo P. Braccini 2, Grugliasco (TO), 10095  
15 Italy. Phone number: +390116708875

16 **Email:** francesca.cardinale@unito.it

17

18 **This PDF file includes:**

19       Supplementary text

20       Figures S1 to S10

21       Tables S1 to S5

22       Legends for Datasets S1 to S3

23       SI References

24 **Other supplementary materials for this manuscript include the following:**

25       Datasets S1 to S3

## 26 **Supplementary text**

27

## 28 **Results**

29

### 30 **Strigolactone deficiency widely affects the transcription of genes in the flowering** 31 **network**

32 Besides the genes highlighted in the manuscript body, we found a down-regulation of several  
33 MADS-box transcription factors involved in tomato floral transition (Table S1, Dataset S2),  
34 namely the *FRUITFULL-like* genes *FUL1* and *FUL2* (1), *MADS-BOX PROTEIN13* (*MBP13*),  
35 *MBP14*, *MBP15*, *MBP18/FYFL*, *MBP20* and *MBP56* (2), *JOINTLESS* (*J*) (3), tomato B-class  
36 MADS-box gene *TM6/TDR6* and *AGAMOUS1* (*TAG1*) (4, 5). Three members of the  
37 *CONSTANS* (*CO*)/*CONSTANS-like* (*COL*) gene family, related to photoperiodic signaling and  
38 flowering in tomato (3), were found down-regulated (*CO1*, *CO3* and *COL4a*), while *COL* was  
39 slightly up-regulated. The transcription factor-encoding gene *NAP2* (*NUCLEOSOME*  
40 *ASSEMBLY PROTEIN2*) of the NAC (*NAM*, *No apical meristem*; *ATAF*; *CUC*, *Cup-shaped*  
41 *Cotyledon*) family, activated by *Apetala3/Pistillata* (*AP3/PI*), is strongly down-regulated ( $\log_2FC$   
42 = -4.5). This protein controls both leaf senescence and fruit yield in tomato, and *NAP2*-  
43 overexpressing plants start producing flowers around one week earlier than wt plants (6, 7).  
44 Three other genes encoding NAC-domain transcription factors, *NAM2* and *NAM3*, and the *NAM*  
45 homologue *GOBLET* (*GOB*), involved in floral morphogenesis in tomato (7, 8), were also down-  
46 regulated in SL- plants. Other DEGs listed in Table S1 have not been functionally characterized  
47 in tomato yet, and have been mainly identified through bioinformatic (9) or transcriptome studies  
48 (10, 11) based on the role of their putative homologues in floral transition pathways of *A.*  
49 *thaliana* and other model plants. Among down-regulated genes we found the tomato  
50 orthologues of the genes coding for: MYB-related transcription factors *LATE ELONGATED*  
51 *HYPOCOTYL* (*LHY*) and *CIRCADIAN CLOCK ASSOCIATED 1* (*CCA1*) (12); *TIMING OF CAB*  
52 *EXPRESSION 1* (*TOC1*), a member of the *PSEUDO-RESPONSE REGULATOR* (*PRR*) family  
53 (9) that controls photoperiodic flowering response in *A. thaliana*, positively regulating *CCA1* and  
54 *LHY* expression (13); the *Transducin/WD40 repeat-like superfamily protein* *COP1*, an E3  
55 ubiquitin-protein ligase that acts as a repressor of photomorphogenesis and is involved in the  
56 degradation of *CO* during the night (14, 15); the *EARLY FLOWERING* (*ELF*) 3 and *ELF4*, which  
57 function as modulators of light signal transduction downstream of phytochromes and control  
58 photoperiodic flowering by interacting with *COP1* and regulating *GIGANTEA* (*GI*) stability (16,  
59 17); and *ELF7*, a RNA polymerase II-associated factor *Paf1* involved in the regulation of  
60 flowering time (18). On the other hand, among the most interesting up-regulated genes, we  
61 found the one encoding the circadian oscillator *GI*, involved in photoperiod-dependent floral  
62 transition in several plant species (19); and a putative orthologue of the AP2-like transcription  
63 factor-encoding *TARGET OF EAT1* (*TOE1*) named *AP2d* (20). Moreover, a set of genes  
64 encoding transcription factors belonging to the large Nuclear Factor Y (*NF-Y*) family, involved  
65 in flowering control (21), were found to be down-regulated in the SL- genotype.

66 Several genes in Table S1 are also related to DNA modifications and chromatin remodeling:  
67 the gene coding for the replication protein *RPA1b* is up-regulated (22, 23), while one for the  
68 *MULTICOPY SUPPRESSOR OF IRA1* (*MSI1*)-like chromatin-adaptor protein *MSI1* (21) is down-  
69 regulated. Also, two genes encoding the DNA mismatch repair proteins *MutS HOMOLOGS*,  
70 *MSH1* (24), and *MSH2* (25), are up- and down-regulated, respectively. Three more  
71 uncharacterized gene products were identified in the GO enrichments process, all of which  
72 were found to be down-regulated in the SL- plants: the putative orthologue of the *A. thaliana*  
73 *BONSAI* (*BNS*), encoding an ubiquitin-protein ligase complex that regulates cell cycle  
74 progression (26); one encoding the cell wall-localized class III peroxidase *PER17*, the  
75 orthologue of which is involved in the transition to flowering and timing of lignified tissue  
76 formation in *A. thaliana* (27); and the one encoding a *Snf1*-related kinase-interacting protein  
77 (*SKI2*, similar to At1g80940), which is annotated as involved in the regulation of flower  
78 development based on InterPro classification.

79

80

## 81 **Materials and Methods**

82

### 83 **Plant materials and growth conditions**

84 The tomato *SICCD7*-silenced line 6936, here called SL-, and its wt genotype M82 were a kind  
85 gift by Dr. H. J. Klee (University of Florida) (28) and show 70-80% reduction of strigolactone

86 content in root tissues and exudates. The  $LA_{pro}>>LA^m-GFP$  genotype (29) expresses *La-2*, a  
87 miR319-insensitive version of *LA* (30), under the control of the *LA* promoter and in translational  
88 fusion with GFP in the M82 background. Seeds were sterilized in 4% (v/v) sodium hypochlorite  
89 containing 0.02% (v/v) Tween 20, rinsed thoroughly with sterile water, and then placed for 48  
90 h on moistened filter paper at 25°C in darkness. Plants were grown for two weeks in a walk-in  
91 climate chamber (16/8h light/dark 25°C) in a seedbed with standard soil (Terra Nature, NPK  
92 12:14:24) and subsequently moved into 5-liter pots under greenhouse conditions. From the  
93 transplanting to the end of the experiments, plants were fertilized with a standard half-strength  
94 Hoagland solution twice a week. Plant age was counted starting at the emergence of cotyledons  
95 from the soil bed.

96 For the experiment described in fig. 2A and S3A, 4-day-old M82 wt plants were sprayed until  
97 runoff on the whole aerial part with a 5  $\mu$ M solution of GR24<sup>5DS</sup> (synthetic strigolactone analogue  
98 from StrigoLab Srl, Turin, Italy) in 0.01% v/v acetone in water (n=6-13). Analogously, the control  
99 plants were sprayed with a corresponding acetone solution. Six days after the first treatment,  
100 when around 50% of the plants were at the transition stage, the plants were split in two groups:  
101 group 1 was not further treated (fig. S3A) while group 2 received an additional GR24<sup>5DS</sup>  
102 treatment (fig. 2A). The meristems were evaluated 4 to 12 days after the first treatment under  
103 the stereomicroscope and classified as vegetative meristem (VM), transition meristem (TM),  
104 inflorescence meristem (IM) or floral meristem (FM).

105 For the leaf-spraying experiment described in fig. 2B-E, 3-week-old wt plants grown under the  
106 same conditions mentioned above were sprayed with the same 5  $\mu$ M solution of GR24<sup>5DS</sup> in  
107 0.01% v/v acetone in water, or with a corresponding acetone solution (n=8). Ripening fruits (31)  
108 were counted until 80 days, and weighed until 92 days after the treatment. Leaves (about 100  
109 mg fw) were collected as above 2, 6, and 24 hours after the treatment and stored at -80°C until  
110 analysis. For the leaf-spraying experiments described in fig. 3C-E, 8-day-old or 4-week-old wt  
111 and  $LA_{pro}>>LA^m-GFP$  plants were treated as above with GR24<sup>5DS</sup> (n=8). The number of leaves  
112 to the first inflorescence was counted at anthesis (*i.e.* stage 3 as defined earlier (32)). For the  
113 experiment in fig. 3A, 4-week-old wt plants were grown and treated as in the experiment in fig.  
114 2B-E (n=5). For each plant, a sample consisting of three young leaves was collected 0, 15', 1h,  
115 6h and 24h after treatment. The samples were processed for gene transcript quantification as  
116 described below. For the experiment in fig. 4 and S5, vegetative wt plants were treated with 5  
117  $\mu$ M GR24<sup>5DS</sup> 8 days after seedling emergence, and harvested one week later; another subset  
118 was treated in the reproductive phase, 23 days after germination, and harvested at 30 days.  
119 Each treatment had n=6 (each sample the pool of 10 individual meristems).

120 For the grafting experiment described in fig. 1, 3B, S2A-B, three grafted lines were produced  
121 by the clamp-grafting technique on plants at the 2/4-leaf stage (about 3 weeks after seedling  
122 emergence) and with a stem diameter of 1.5–2 mm (n=5; wt or SL- rootstock and scion, wt/wt  
123 or SL-/SL-, respectively; and wt scion grafted to a SL- rootstock, wt/SL-). After 3 additional  
124 weeks of acclimation, grafted plants were transplanted and grown in the greenhouse as above.  
125 The daily count of new individual flowers at anthesis started 3 weeks after graft production (*i.e.*  
126 at transplant) and continued for 3 weeks. A subset of self-grafted wt/wt plants were treated 1  
127 and 3 weeks after grafting with 5  $\mu$ M GR24<sup>5DS</sup>. Ripening fruits (31) were counted and weighed  
128 60 days after grafting. For gene transcript quantification, leaves of comparable physiological  
129 stage (about 100 mg fw) were collected 20 days after grafting from each plant, deep-frozen,  
130 and stored at -80°C until analysis.

131 For transcriptome analysis, at least 3 fully expanded leaves were collected (one per plant) from  
132 5 wt and SL- plants, grown for 3 weeks after seedling emergence in a walk-in climate chamber  
133 set at 16/8h light/dark 25°C. Leaves were collected at 9.00 am, 3 h into the light period.

### 135 **Library construction, sequencing, and processing of mRNA data**

136 Total RNA was extracted from 3-week-old wt and SL- tomato leaves using the Spectrum Plant  
137 Total RNA Kit (Sigma Aldrich). After digestion of contaminant DNA by DNase I  
138 (ThermoScientific) at 37°C for 30 min, RNA quantity and quality were determined with a  
139 Nanodrop 2000 spectrophotometer (Thermo Fisher Scientific Inc., Wilmington, DE, United  
140 States) and sent to Novogene Europe for library construction and sequencing (Cambridge,  
141 United Kingdom). There, RNA degradation and contamination were monitored on 1% agarose  
142 gels, RNA purity was checked using the NanoPhotometer® spectrophotometer (IMPLEN, CA,  
143 USA), and RNA integrity (RIN>6) and quantities were assessed using the RNA Nano 6000  
144 Assay Kit of the Bioanalyzer 2100 system (Agilent Technologies, CA, USA). cDNA libraries  
145 were prepared from 1  $\mu$ g total RNA using NEBnext Ultra TM RNA Library Prep Kit for Illumina

146 (NEB, USA) following the manufacturer's recommendations. A total of six libraries (three each  
147 for wt and SL- leaves) were constructed and quantified using a Qubit 2.9 fluorometer (Life  
148 Technologies) and sequenced on an Illumina platform to generate paired-end reads. Raw reads  
149 of FASTQ format were processed through in-house scripts and clean reads were obtained by  
150 removing reads containing adapter, poly-N sequences and reads with low quality. A total of  
151 35825 high-quality, clean reads were mapped using HISAT2 (33) to the reference genome of  
152 *Solanum lycopersicum* cv "Heinz 170" assembly ITAG SL3.0  
153 ([https://www.ebi.ac.uk/ena/data/view/GCA\\_000188115.3](https://www.ebi.ac.uk/ena/data/view/GCA_000188115.3)). Expressed genes passing quality  
154 checks, trimming and FPKM filtering are listed in Table S4. The number of mapped reads for  
155 each gene was counted using htseq-count (34). Values of fragments per kilobase of exon per  
156 million fragments mapped (FPKM) for the assembled transcription units were calculated. After  
157 filtering and trimming, approximately 31.63 to 47.29 million clean pair-end reads were obtained  
158 from each of the six libraries. Expressed tomato genes ranged from 18261 (sample SL-\_2) to  
159 19048 (sample wt\_3, Table S4), using a cut-off FPKM value > 0.3 to declare a gene as  
160 expressed. The DESeq2 R package was used to normalize expression levels and perform  
161 differential expression analysis based on the negative binomial distribution (35). Following read  
162 count normalization, the resulting P values were adjusted using the Benjamini and Hochberg's  
163 approach for controlling the False Discovery Rate (FDR). Genes with a Benjamini–Hochberg  
164 adjusted p value/FDR < 0.05 and a log<sub>2</sub> fold change (log<sub>2</sub>FC) >+0.7;<-0.7 were assigned as  
165 DEGs. A high Pearson's correlation coefficient (r) was observed among FPKM values of  
166 biological replicates of the same genotype and condition in the sequenced set (average r =  
167 0.92). Considering the mean of three biological replicates for each genotype, 18013 genes were  
168 found to be expressed in both lines, while 983 genes were only expressed in wt and 696 genes  
169 in SL- plants (fig. S10A). A total of 8166 protein-coding genes were found differentially  
170 expressed (DEGs) in the SL- plants with respect to wt (FDR ≤ 0.05; Dataset S3), corresponding  
171 to 23.56% of the predicted protein-coding genes. These genes were additionally filtered based  
172 on their log<sub>2</sub> FC (thresholds -0.7 > log<sub>2</sub>FC > +0.7). After filtering, we obtained a dataset of 7140  
173 DEGs, which display a higher proportion of down-regulated genes in the SL- plants (5412) in  
174 comparison to up-regulated genes (1728) (fig. S10B). To confirm the RNAseq results, we  
175 analyzed the expression of selected genes by qRT-PCR, focusing on flowering-related loci. Fig.  
176 S8 shows high correlation between transcript levels observed in the RNAseq dataset and in  
177 targeted qRT-PCR on independent samples.

### 178 179 **Functional analysis of tomato DEGs**

180 Enrichment analysis of each DEG gene ontology (GO) term and KEGG pathway (36) was  
181 performed with the ShinyGO v0.61 GO Enrichment Analysis tool using default parameters  
182 (<http://bioinformatics.sdstate.edu/go/>) (37) and comparing the frequency of query genes with  
183 the complete reference genome for *S. lycopersicum* (SL 3.0). Enrichment analyses were based  
184 on a hypergeometric distribution followed by FDR correction. Significant GO terms and KEGG  
185 functional categories (FDR < 0.05) were reported.

### 186 187 **Gibberellin treatments and quantification**

188 For the assessment of general gibberellin sensitivity, 2-week-old wt and SL- plants (n=8) were  
189 sprayed on the whole aerial part with a 10 μM solution of GA<sub>3</sub> (Sigma-Aldrich) until runoff.  
190 Control plants were sprayed with a corresponding volume of water only. The increment of the  
191 first internode length was measured every five days, starting from five days after the treatment  
192 and reported as the difference between the measured values of GA<sub>3</sub>-treated and mock-treated  
193 plants of the same genotype at the same time point.

194 The sample preparation and analysis of gibberellins were performed as described (38) with  
195 some modifications. Briefly, tissue samples of about 5 mg dry weight (DW) from n=3 biological  
196 replicates were ground to a fine powder using 2.7-mm zirconium oxide beads (Retsch GmbH  
197 & Co. KG, Haan, Germany) and a MM 400 vibration mill at a frequency of 30 Hz for 3 min  
198 (Retsch GmbH & Co. KG, Haan, Germany) with 1 mL of ice-cold 80 % acetonitrile  
199 containing 5 % formic acid as extraction solution. The samples were then extracted overnight  
200 at 4 °C using a benchtop laboratory rotator Stuart SB3 (Bibby Scientific Ltd., Staffordshire, UK)  
201 after adding 17 internal gibberellin standards ([<sup>2</sup>H<sub>2</sub>]GA<sub>1</sub>, [<sup>2</sup>H<sub>2</sub>]GA<sub>3</sub>, [<sup>2</sup>H<sub>2</sub>]GA<sub>4</sub>, [<sup>2</sup>H<sub>2</sub>]GA<sub>5</sub>, [<sup>2</sup>H<sub>2</sub>]GA<sub>6</sub>,  
202 [<sup>2</sup>H<sub>2</sub>]GA<sub>7</sub>, [<sup>2</sup>H<sub>2</sub>]GA<sub>8</sub>, [<sup>2</sup>H<sub>2</sub>]GA<sub>9</sub>, [<sup>2</sup>H<sub>2</sub>]GA<sub>15</sub>, [<sup>2</sup>H<sub>2</sub>]GA<sub>19</sub>, [<sup>2</sup>H<sub>2</sub>]GA<sub>20</sub>, [<sup>2</sup>H<sub>2</sub>]GA<sub>24</sub>, [<sup>2</sup>H<sub>2</sub>]GA<sub>29</sub>, [<sup>2</sup>H<sub>2</sub>]GA<sub>34</sub>,  
203 [<sup>2</sup>H<sub>2</sub>]GA<sub>44</sub>, [<sup>2</sup>H<sub>2</sub>]GA<sub>51</sub>, and [<sup>2</sup>H<sub>2</sub>]GA<sub>53</sub> (OChemIm, Czech Republic). The homogenates were  
204 centrifuged at 36,670 g and 4 °C for 10 min, then the corresponding supernatants were further  
205 purified using mixed-mode SPE cartridges (Waters, Milford, MA, USA) and analyzed by ultra-

206 high performance liquid chromatography-tandem mass spectrometry (UHPLC-MS/MS;  
207 Micromass, Manchester, UK). Gibberellins were detected using multiple-reaction monitoring  
208 mode of the transition of the ion  $[M-H]^-$  to the appropriate product ion. The Masslynx 4.2  
209 software (Waters, Milford, MA, USA) was used to analyze the data and the standard isotope  
210 dilution method (39) was used to quantify endogenous gibberellin levels.

211

### 212 **Gene transcript quantification**

213 Total RNA from tomato leaves was extracted with the Spectrum Plant Total RNA Kit (Sigma  
214 Aldrich) and treated with DNase I (ThermoScientific) at 37°C for 30 min to remove residual  
215 genomic DNA. First-strand cDNA was synthesized from 3 µg of purified total RNA using the  
216 High-Capacity cDNA Reverse Transcription Kit (Applied Biosystems) according to the  
217 manufacturer's instructions. A modified protocol with a stem-loop primer (40) was followed for  
218 targeted miR319 and miR156 cDNA synthesis. qRT-PCR was carried out in a StepOnePlus  
219 machine (Applied Biosystems) using the SYBR method (Luna Universal One-Step RT-qPCR  
220 Kit, New England Biolabs); for loci and primers, see Table S4. Transcript concentrations were  
221 normalized on *ACTIN (ACT)*, *ELONGATION FACTOR-1α (EF-1α)* or *small nuclear RNA U6*  
222 (*snU6*) transcripts as endogenous controls. Three independent biological replicates were  
223 analyzed as a minimum, and each qRT-PCR reaction was run in technical triplicates. Transcript  
224 amounts were quantified through the  $2^{-\Delta\Delta C_t}$  method.

225

### 226 **Statistical analysis**

227 Significant differences among grafted plants were statistically analyzed by applying a one-way  
228 ANOVA test and Tukey's HSD post-hoc test was used for mean separation when ANOVA  
229 results were significant ( $p < 0.05$ ). Significant differences of pairwise comparisons were  
230 assessed by Student's t test. The SPSS statistical software package (SPSS Inc., Cary, NC,  
231 v.22) was used. RNAseq results were validated via qRT-PCR as previously done (41) on genes  
232 related to flowering. In short,  $\log_2FC$  values of *SFT* (Soly03g063100.2), *SP5G*  
233 (Soly05g053850.3), *SP6A* (Soly05g055660.2), *MBP20* (Soly02g089210.3), *FUL1*  
234 (Soly06g069430.3), *LA* (Soly07g062680.2), *GA2ox4* (Soly07g061720.3), *GA2ox2*  
235 (Soly06g035530.3), *GA3ox2* (Soly03g119910.3) were obtained from both RNAseq and qRT-  
236 PCR analyses by contrasting SL- with wt plants. The Spearman's rank correlation method (42)  
237 was used to analyze the correlation between these two datasets. A Spearman's  $\rho \geq 0.75$  was  
238 used as threshold to consider two datasets positively highly correlated.

239 **A**

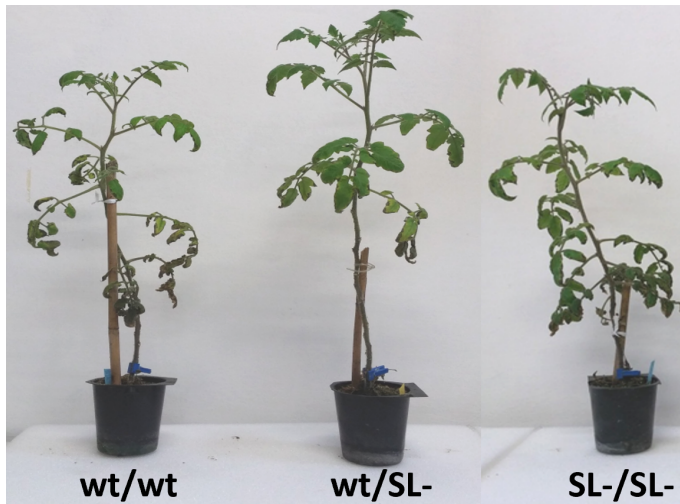

240

241

242 **B**

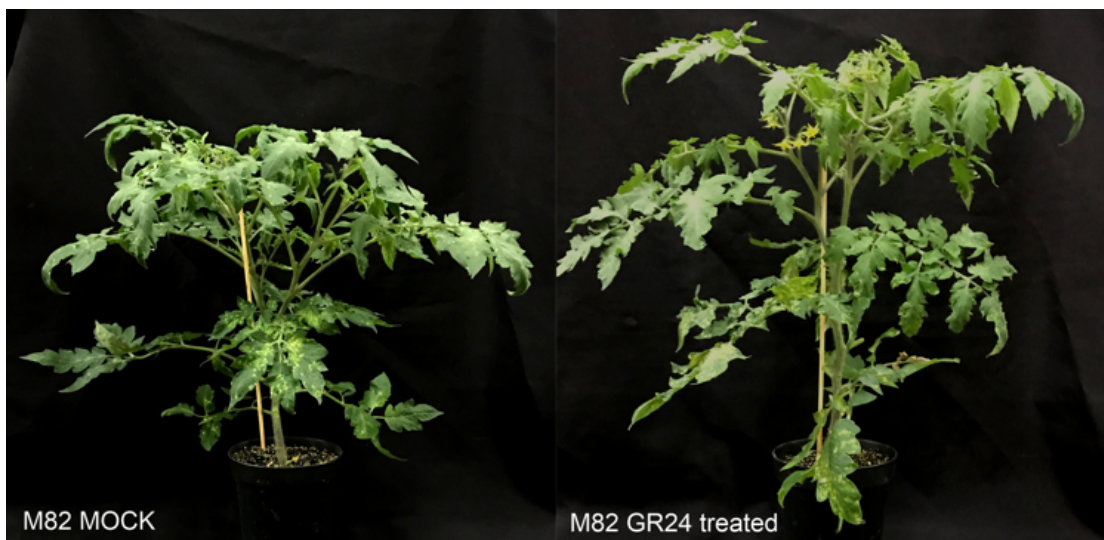

243

244

245 **Fig. S1. (A)** Appearance of wt/wt, wt/SL- and SL-/SL- plants 30 days after grafting. **(B)** Tomato  
246 plants cv M82 at anthesis (around 5 weeks from seedling emergence). The plant on the right  
247 was treated with 5  $\mu$ M GR24<sup>5DS</sup> 8 days after seedling emergence, while the plant on the left  
248 was mock treated at the same age.

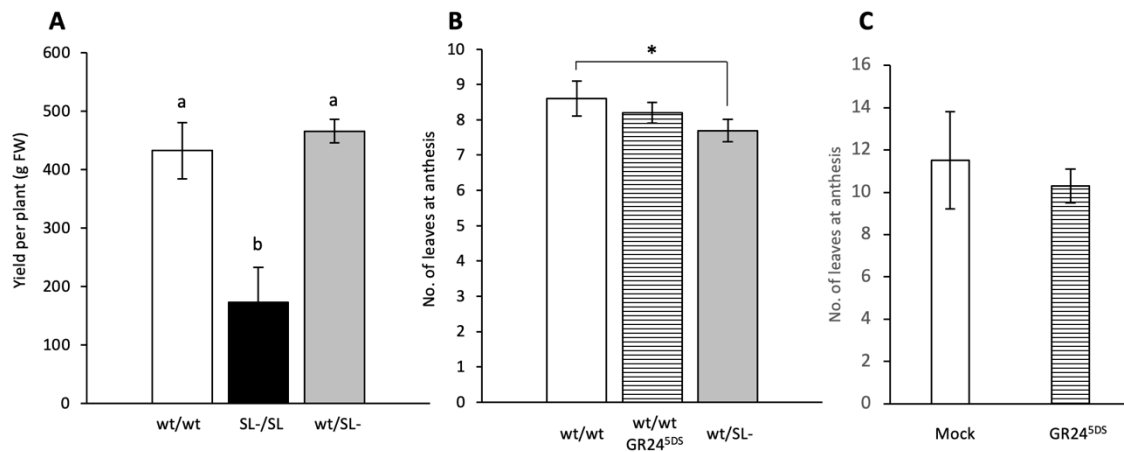

250  
 251  
 252  
 253  
 254  
 255  
 256  
 257  
 258  
 259  
 260  
 261

**Fig. S2.** Effects of different grafting combinations and/or treatment with 5 μM GR24<sup>5DS</sup> on (A) cumulative yield per plant in homo- or hetero-grafting of wt and strigolactone-depleted (SL-) scions and rootstocks. (B) Comparisons between the number of leaves at the time of anthesis in mock-treated wt/wt plants, wt/SL- plants and wt/wt plants or (C) non-grafted wt plants treated with 5 μM GR24<sup>5DS</sup> (1 and 3 weeks after grafting). Data represent the mean ± SE of n=10 biological replicates. \* indicates significant differences between wt/wt plants and wt/SL- plants, as determined by Student's t test ( $p < 0.05$ ). In panel A the letters indicate significant differences as determined by a one-way ANOVA test and Tukey's HSD post-hoc test ( $p < 0.05$ ).

262

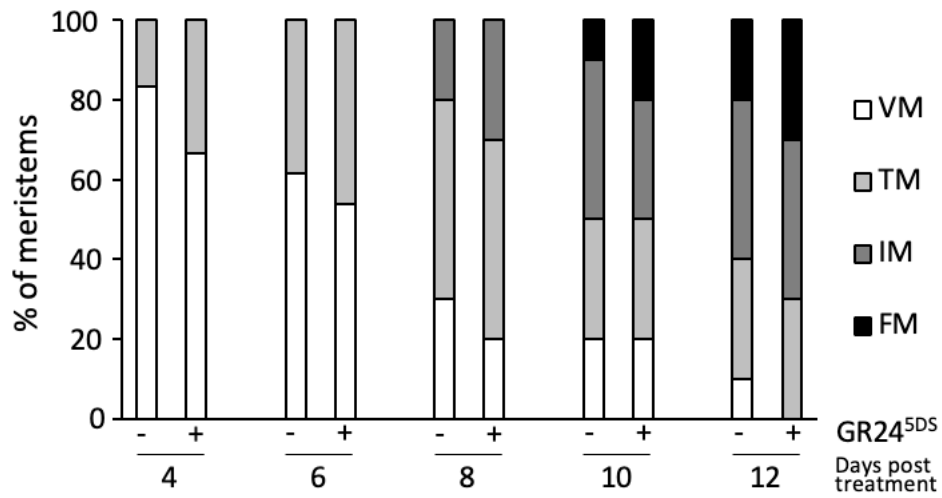

263

264

265 **Fig. S3.** Meristem maturation of mock- or GR24<sup>5DS</sup>-treated plants. For representative images  
266 of the four sequential developmental stages: vegetative meristem (VM), transition meristem  
267 (TM), inflorescence meristem (IM) and floral meristem (FM), see fig. 2A. Plants were treated  
268 with a 5  $\mu$ M solution 4 days after seedling emergence, i.e. before floral transition. The  
269 meristems were evaluated under the stereomicroscope 4 to 12 days after the treatment (n=6-  
270 13).



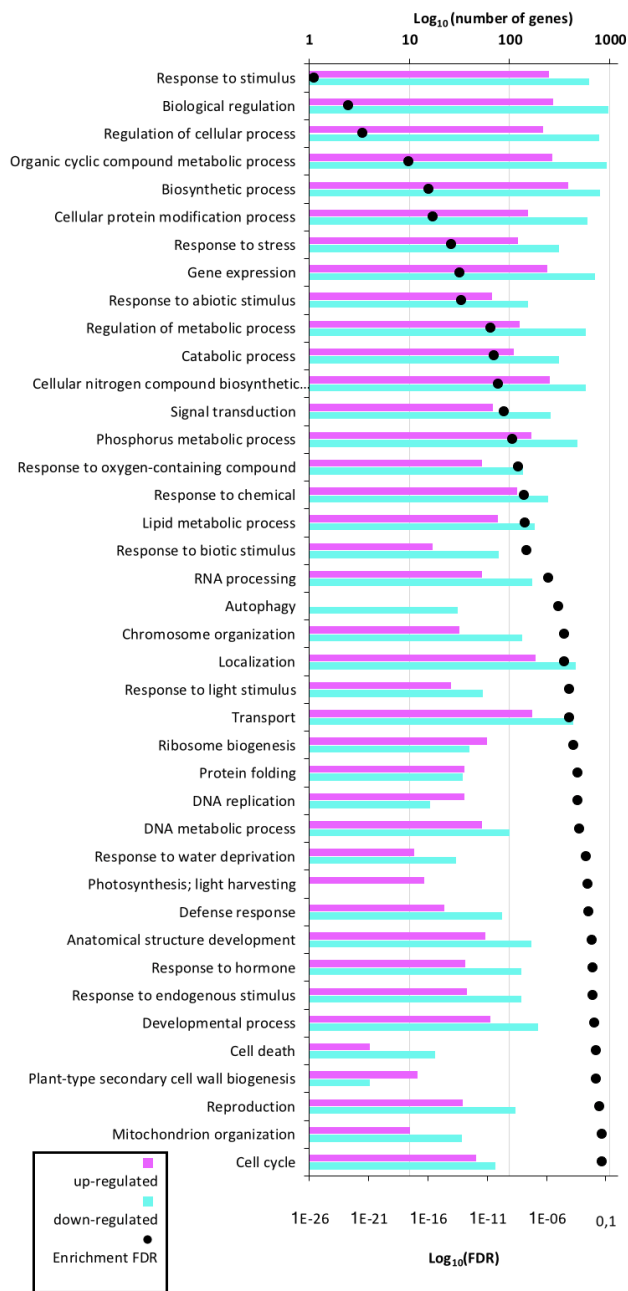

272

273

274 **Fig. S4.** Functional GO categories from the BP-GO enrichment of DEGs in strigolactone-  
 275 depleted leaves in comparison to wt. Light blue and fuchsia bars indicate the number of up-  
 276 and down-regulated DEGs, respectively. Black dots show the Log<sub>10</sub>FDR value of each enriched  
 277 category, with FDR < 0.05 as a threshold.

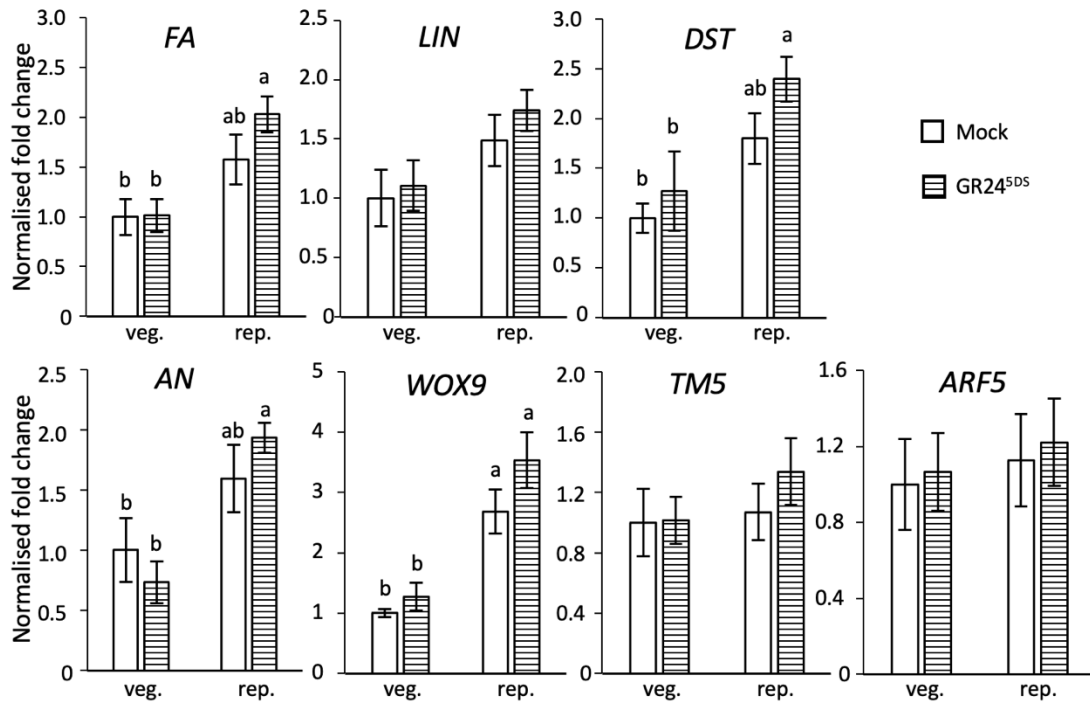

278

279 **Fig. S5.** Effects of exogenous strigolactones and age on the transcripts of marker genes for  
 280 meristematic development: *FA* (*FALSIFLORA*); *LIN* (*LONG INFLORESCENCE*); *DST*  
 281 (*DELAYED SYMPODIAL TERMINATION*); *AN* (*ANANTHA*); *WOX9* (*WUSCHEL-RELATED*  
 282 *HOMEBOX9*); *TM5* (*TOMATO MAD5*); *ARF5* (*AUXIN RESPONSE FACTOR5*). Vegetative  
 283 (veg.) wt plants were treated with 5  $\mu$ M GR24<sup>5DS</sup> 8 days after seedling emergence, and  
 284 harvested one week later; another subset was treated in the reproductive (rep.) phase, 23 days  
 285 after germination, and harvested 30 days after germination. Transcript abundances were  
 286 normalized to endogenous *EF1 $\alpha$*  and *ACT* and presented as fold-change value over mean  
 287 values of meristems in untreated vegetative plants, which were set to 1. Data represent the  
 288 mean  $\pm$  SE of n=6 biological replicates (each the pool of 10 apical meristems) analyzed in  
 289 technical triplicates. Different letters on top of bars indicate statistically significant differences  
 290 among all samples as determined with one-way ANOVA followed by Tukey's post-hoc test; no  
 291 significant differences for pairwise comparisons between treated and untreated samples of the  
 292 same age could be detected by Student's t-test ( $p < 0.05$ ).

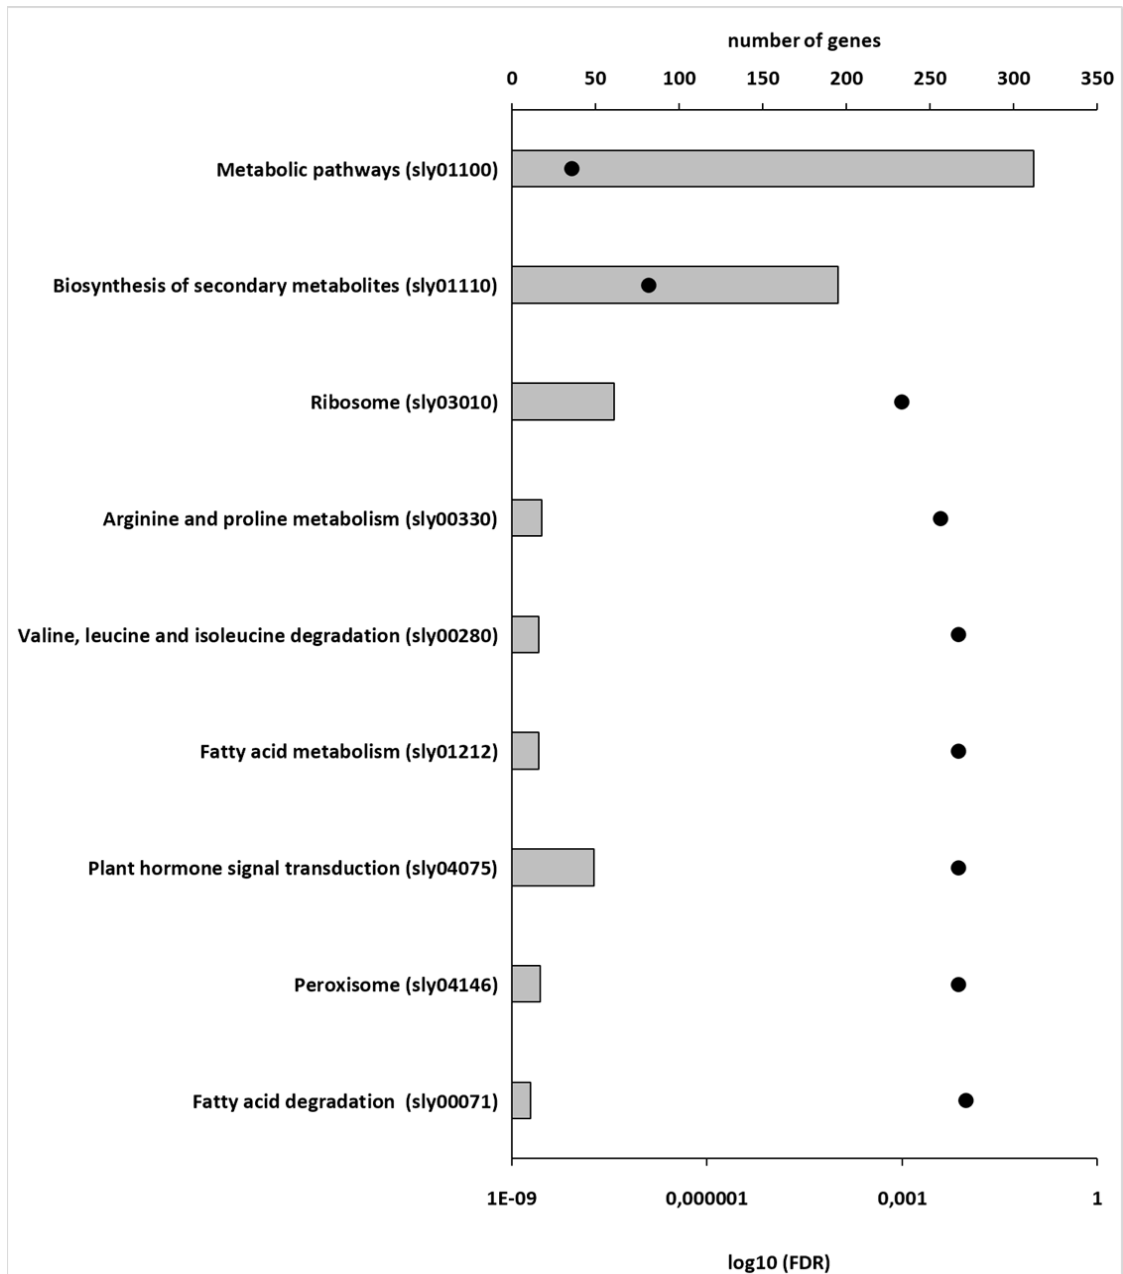

293  
 294  
 295  
 296  
 297  
 298

**Fig. S6.** KEGG pathways categories enriched among DEGs in leaves of strigolactone-depleted tomato plants in comparison to wt. Grey bars indicate the number of DEGs and black dots show the Log<sub>10</sub>FDR value for each enriched KEGG pathway category identified by the KEGG ID in brackets, with FDR < 0.05 as a threshold.

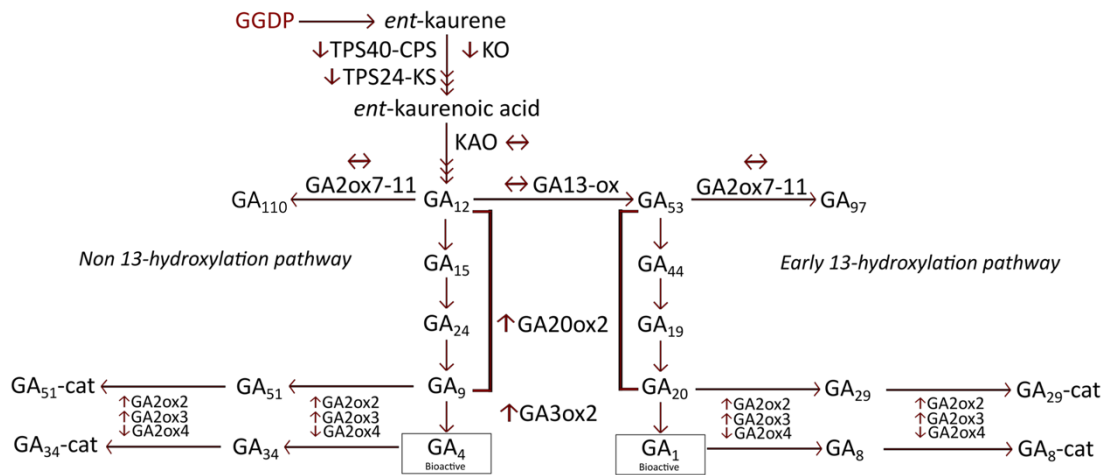

299

300

301

302

303

304

305

306

307

**Fig. S7.** Schematic representation of the tomato gibberellin (GA) biosynthetic pathway. GGDP, geranylgeranyl diphosphate; CPS (TPS40), *ent*-copalyl diphosphate synthase; KS (TPS24), *ent*-kaurene synthase; KO, *ent*-kaurene oxidase; KAO, *ent*-kaurenoic acid oxidase; GA13ox, GA 13-oxidase; GA20ox, GA 20-oxidase; GA3ox, GA 3-oxidase; GA2ox, GA 2-oxidase; GA-cat, GA-catabolite. Arrows by gene acronyms indicate whether each gene is up- or down-regulated, or remains stable in strigolactone-depleted plants compared to the wt.

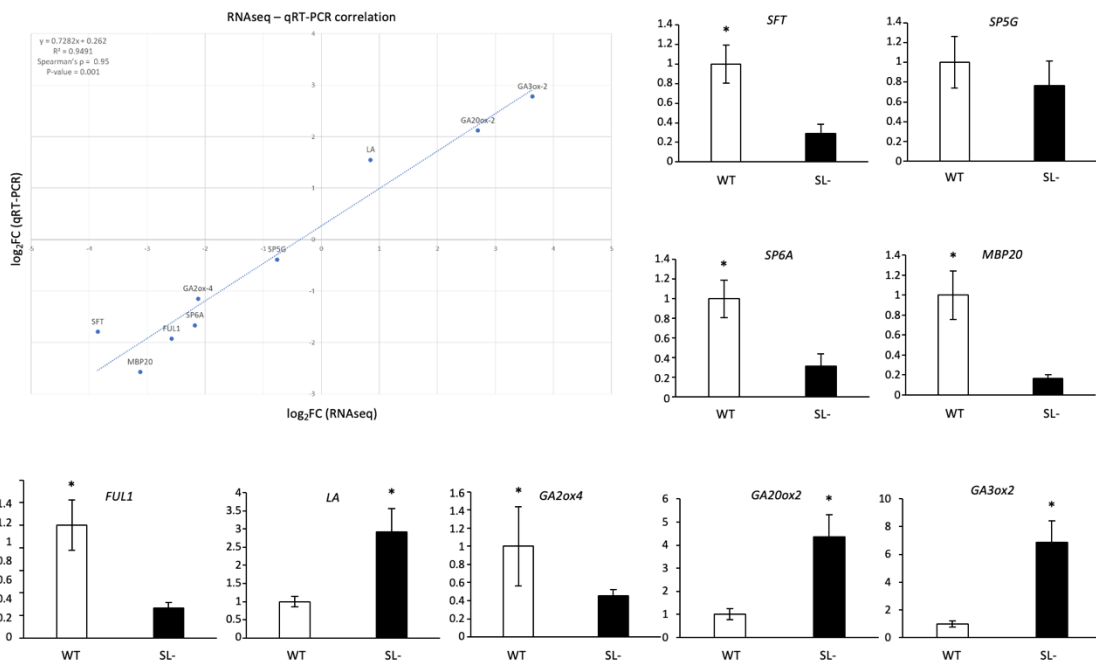

309

310 **Fig. S8.** RNAseq validation through qRT-PCR analysis. **Upper left:** correlation between  
 311 RNAseq (x-axis) and qRT-PCR (y-axis)  $\log_2FC$  values of transcripts obtained by comparing  
 312 strigolactone-depleted (SL-) and wt plants. Correlation was calculated through the Spearman's  
 313 rank correlation method (Spearman's  $\rho$  and p-value,  $R^2$  and best-fit line equation are shown).  
 314 **All other panels:** validation of the RNAseq analysis by qRT-PCR. Transcript quantification of  
 315 *SFT* (Solyc03g063100.2); *SP5G* (Solyc05g053850.3); *SP6A* (Solyc05g055660.2); *MBP20*  
 316 (Solyc02g089210.3); *FUL1* (Solyc06g069430.3); *LA* (Solyc07g062680.2); *GA2ox4*  
 317 (Solyc07g061720.3); *GA2ox2* (Solyc06g035530.3); *GA3ox2* (Solyc03g119910.3). Transcript  
 318 abundances were normalized to endogenous *EF1 $\alpha$*  and *ACT* and presented as fold-change  
 319 values over mean values of wt plants, which were set to 1. Data represent the mean  $\pm$  SE of  
 320  $n=3$  biological replicates. \* indicates significant differences as determined by Student's t test ( $p$   
 321  $< 0.05$ ).

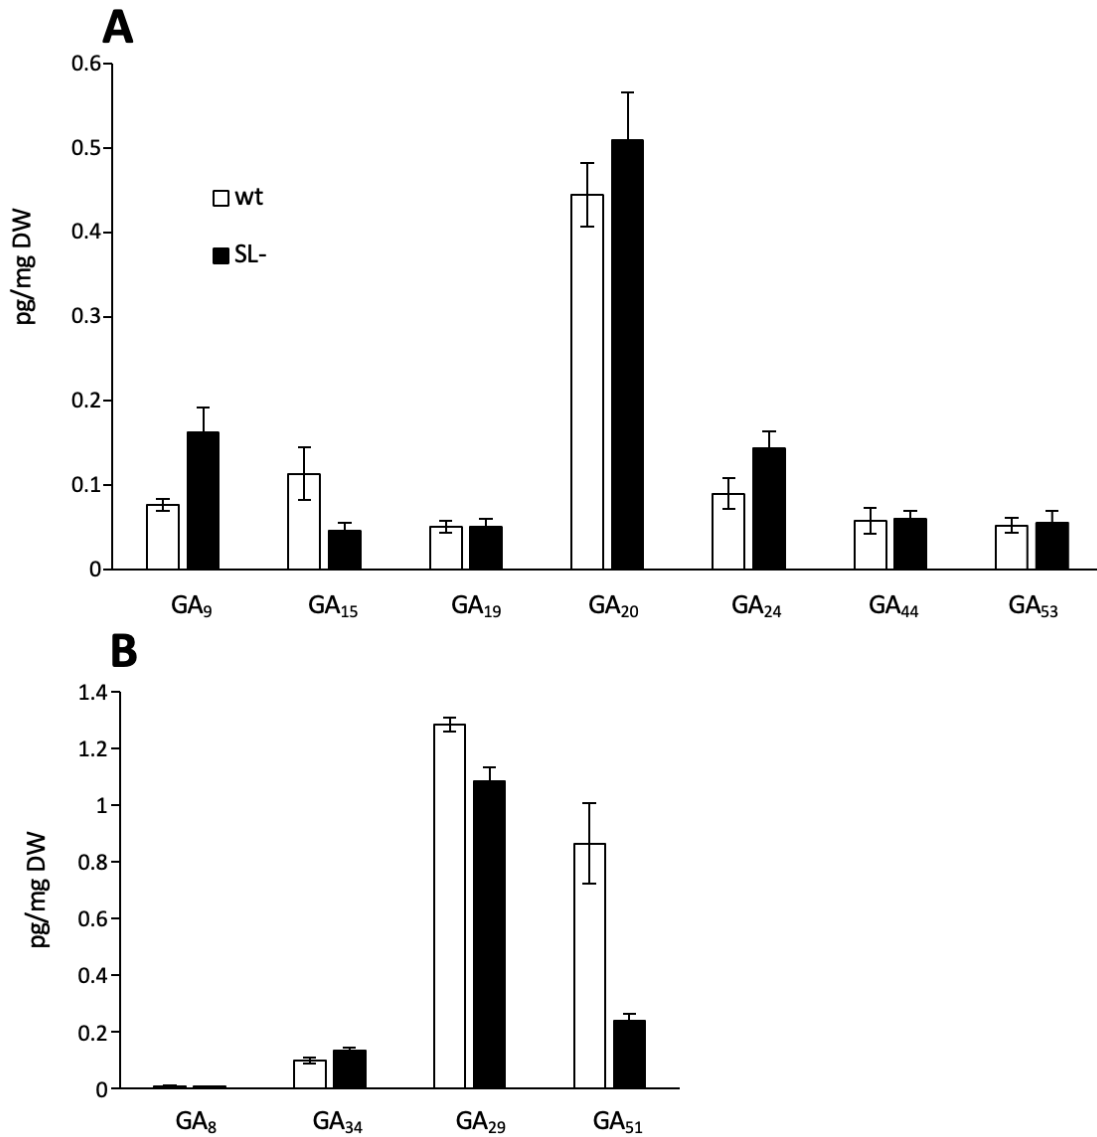

322  
323  
324  
325  
326  
327  
328

**Fig. S9.** Effect of strigolactone deprivation on gibberellin metabolism. **(A)** Concentration of the biosynthetic precursors of bioactive gibberellins and **(B)** of their deactivation products in wt and strigolactone-depleted (SL-) plants. Data represent the mean  $\pm$  SE of n=3 biological replicates analyzed in technical quadruplicates. See fig. S7 for metabolite positioning in the gibberellin pathway.

329

330

331

332

333

334

335

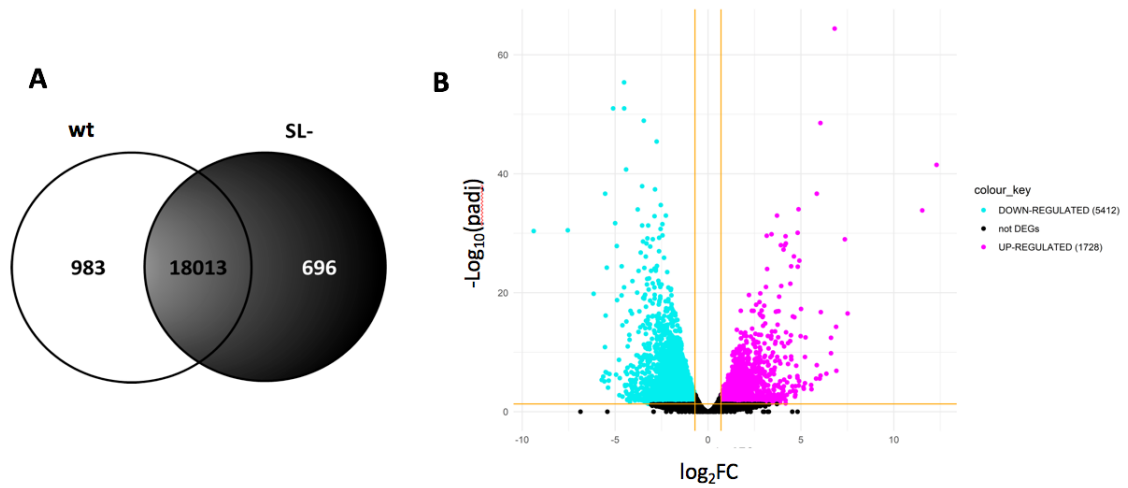

336

337

338

339 **Fig. S10.** Comparison of expressed genes between wt and strigolactone-depleted (SL-) tomato  
340 lines. **(A)** Venn diagram displaying the number of genes identified in either or both genotypes;  
341 **(B)** volcano plot of the number and distribution of up- and down-regulated DEGs (FDR < 0.05,  
342 log<sub>2</sub>FC >+0.7 and <-0.7 respectively), showing statistical significance (padjust) versus  
343 magnitude of change (fold change, FC).

344  
345  
346

**Table S1.** Selection of tomato DEGs between wt and strigolactone-depleted leaves related to flowering and/or included in the GO category Reproduction (GO: 0000003). A comprehensive list of all DEGs related to this category can be found in Dataset S2.

| Gene ID          | log <sub>2</sub> FC | ITAG3.0 annotation                                     | <i>S. lycopersicum</i> gene acronym | <i>A. thaliana</i> orthologue | <i>A. thaliana</i> acronym |
|------------------|---------------------|--------------------------------------------------------|-------------------------------------|-------------------------------|----------------------------|
| Solyc03g119910.3 | 3.64                | <i>Le3OH-23b-hydroxylase</i>                           | GA3ox2                              | AT1G15550                     | GA3OX1                     |
| Solyc04g054150.1 | 2.84                | <i>Nuclear transcription factor Y protein</i>          | NF-YB3                              | AT4G14540                     | NF-YB3                     |
| Solyc06g035530.3 | 2.70                | <i>Gibberellin 20-oxidase-2</i>                        | GA20ox2                             | AT5G51810                     | GA20OX2                    |
| Solyc08g005610.3 | 2.29                | <i>Abscisic acid 8'-hydroxylase</i>                    | CYP707A2                            | AT5G45340                     | CYP707A3                   |
| Solyc04g071990.3 | 2.15                | GIGANTEA                                               | GI                                  | AT1G22770                     | GI                         |
| Solyc06g069230.3 | 1.98                | <i>DNA mismatch repair protein</i>                     | MSH2                                | AT3G18524                     | MSH2                       |
| Solyc03g093610.1 | 1.67                | <i>Ethylene response factor A.2</i>                    | ERFA2                               | AT5G47220                     | ERF2                       |
| Solyc03g115050.3 | 1.63                | <i>Replication A 70 kDa DNA-binding subunit</i>        | RPA1B                               | AT5G08020                     | RPA1B                      |
| Solyc11g072600.2 | 1.14                | APETALA 2d                                             | AP2d                                | AT2G28550                     | TOE1                       |
| Solyc07g006630.3 | 0.97                | CONSTANS-like protein                                  | COL                                 | AT5G15850                     | CO                         |
| Solyc07g062680.2 | 0.85                | Lanceolate                                             | LA                                  | AT3G15030                     | TCP4                       |
| Solyc02g084630.3 | -0.72               | <i>TDR6 transcription factor</i>                       | TM6/TDR6                            | AT5G23260                     | AGL32/TT16                 |
| Solyc05g053850.3 | -0.76               | SELF PRUNING 5G                                        | SP5G                                | AT1G65480                     | FT                         |
| Solyc11g010570.2 | -0.78               | Jointless                                              | J                                   | AT2G22540                     | AGL22/SVP                  |
| Solyc12g056460.2 | -1.07               | <i>MADS box transcription factor</i>                   | MBP14                               | AT2G45660                     | AGL20                      |
| Solyc12g096500.2 | -1.08               | CONSTANS-like protein                                  | COL4a                               | AT5G24930                     | COL4                       |
| Solyc03g121010.3 | -1.21               | <i>RNA polymerase II-associated factor 1 like</i>      | ELF7                                | AT1G79730                     | ELF7                       |
| Solyc01g079870.3 | -1.21               | CONSTANS interacting protein 2b                        | NF-YC9                              | AT1G08970                     | NF-YC9                     |
| Solyc10g009080.3 | -1.36               | <i>Squamosa promoter binding protein 3</i>             | SBP3                                | AT2G33810                     | SPL3                       |
| Solyc11g011980.2 | -1.37               | <i>Transducin/WD40 repeat-like superfamily protein</i> | COP1                                | AT2G32950                     | COP1                       |
| Solyc02g089540.3 | -1.40               | CONSTANS 1                                             | CO1                                 | At5G15841                     | CO                         |
| Solyc03g006830.3 | -1.46               | <i>MADS-box transcription factor</i>                   | MBP18/FYFL                          | AT5G62165                     | AGL42                      |
| Solyc01g098390.3 | -1.52               | <i>Gibberellin receptor</i>                            | GID1a                               | AT3G05120                     | GID1A                      |
| Solyc03g117670.3 | -1.55               | <i>Snf1-related kinase interacting protein</i>         | SKI2                                | AT1G80940                     | -                          |
| Solyc09g074270.3 | -1.57               | <i>Gid1-like gibberellin receptor</i>                  | GID1b1                              | AT3G63010                     | GID1B                      |
| Solyc01g008490.3 | -1.61               | <i>Nuclear transcription factor Y subunit</i>          | NF-YA1                              | AT5G12840                     | NF-YA1                     |



|                  |       |                                                                          |                |           |           |
|------------------|-------|--------------------------------------------------------------------------|----------------|-----------|-----------|
| Solyc10g005080.3 | -1.64 | Late elongated hypocotyl and circadian clock associated-1-like protein 1 | LHY            | AT1G01060 | LHY       |
| Solyc08g065870.3 | -1.69 | EARLY FLOWERING 3                                                        | ELF3           | AT2G25930 | ELF3      |
| Solyc08g006570.3 | -1.70 | ANAPHASE-PROMOTING COMPLEX 13 Bonsai protein                             | Solyc08g006570 | AT1G73177 | APC13/BNS |
| Solyc11g010120.2 | -1.72 | Peroxidase                                                               | PER17          | AT2G22420 | PRX17     |
| Solyc02g084740.3 | -1.87 | Cytochrome P-50 - 3-epi-6-deoxocathasterone 23-monooxygenase             | CYP90C2/DUMPY  | AT4G36380 | ROT3      |
| Solyc01g087240.3 | -1.96 | Nuclear transcription factor Y subunit A-9                               | NF-YA9         | AT3G20910 | NF-YA9    |
| Solyc07g061720.3 | -2.12 | Gibberellin 2-oxidase 4                                                  | GA2ox4         | AT1G78440 | GA2OX1    |
| Solyc08g062210.3 | -2.13 | Nuclear transcription factor Y subunit                                   | NF-YA8         | AT1G17590 | NF-YA8    |
| Solyc08g080100.3 | -2.17 | MADS-box transcription factor                                            | MBP13          | AT4G22950 | AGL19     |
| Solyc05g055660.2 | -2.18 | Flowering locus T protein                                                | SP6A           | AT1G65480 | FT        |
| Solyc07g049530.3 | -2.22 | 1-Aminocyclopropane-1-carboxylate oxidase 1                              | ACO1           | AT2G19590 | ACO1      |
| Solyc07g062840.3 | -2.25 | Goblet                                                                   | GOBLET         | AT5G53950 | CUC2      |
| Solyc03g115770.2 | -2.40 | Timing of cab expression 1/pseudo-response regulator 1                   | TOC1           | AT5G61380 | TOC1      |
| Solyc09g090890.2 | -2.41 | DNA mismatch repair protein                                              | MSH1           | AT3G24320 | MSH1      |
| Solyc06g069710.3 | -2.42 | NAC domain protein                                                       | NAM3           | AT5G61430 | NAC100    |
| Solyc03g115850.3 | -2.52 | NAC domain-containing protein                                            | NAM2           | AT5G61430 | NAC100    |
| Solyc06g069430.3 | -2.58 | FRUITFULL-like MADS-box 1                                                | FUL1           | AT3G30260 | AGL79     |
| Solyc01g006930.3 | -2.88 | Nuclear transcription factor Y subunit A-10, putative                    | NF-YA10        | AT5G06510 | NF-YA10   |
| Solyc12g087830.2 | -2.98 | MADS-box transcription factor                                            | MBP15          | AT1G47760 | AGL102    |
| Solyc11g020290.2 | -3.07 | WD-40 repeat-containing protein MSI1                                     | WDR238         | AT5G58230 | MSI1      |
| Solyc02g089210.3 | -3.12 | MADS box transcription factor                                            | MBP20          | AT1G69120 | AP1       |
| Solyc02g089520.2 | -3.46 | CONSTANS protein                                                         | CO3            | At5G15840 | CO        |

|                  |       |                                               |                      |           |               |
|------------------|-------|-----------------------------------------------|----------------------|-----------|---------------|
| Solyc12g009050.2 | -3.46 | <i>Nuclear transcription factor Y subunit</i> | <i>NF-YA3</i>        | AT1G72830 | <i>NF-YA3</i> |
| Solyc03g063100.2 | -3.85 | <i>Single flower truss</i>                    | <i>SP3D; SFT</i>     | AT1G65480 | <i>FT</i>     |
| Solyc12g042967.1 | -3.87 | <i>Agamous-like MADS-box protein AGL80</i>    | <i>MADS56</i>        | AT5G48670 | <i>AGL80</i>  |
| Solyc06g051680.1 | -4.13 | <i>Protein EARLY FLOWERING 4</i>              | <i>ELF4</i>          | AT2G40080 | <i>ELF4</i>   |
| Solyc04g005610.3 | -4.51 | <i>NAC domain protein NAC2</i>                | <i>NAP2</i>          | AT1G69490 | <i>NAC029</i> |
| Solyc03g114830.3 | -4.75 | <i>FRUITFULL-like MADS-box 2</i>              | <i>MBP7/FUL/FUL2</i> | AT5G60910 | <i>AGL8</i>   |

347

348

349  
350  
351

**Table S2.** Tomato DEGs involved in auxin biosynthesis and metabolism ([GO:0009851] and [GO:0009850]), transport and export ([GO:0009926] and [GO:0010315]), and responses ([GO:0009734] and [GO:0009733]) as retrieved after the differential expression analysis.

| Gene ID                                                                                         | log <sub>2</sub> FC | ITAG 3.0 annotation                        | <i>S. lycopersicum</i> gene acronym | <i>A. thaliana</i> orthologue | <i>A. thaliana</i> gene acronym |
|-------------------------------------------------------------------------------------------------|---------------------|--------------------------------------------|-------------------------------------|-------------------------------|---------------------------------|
| <b>auxin biosynthetic process [GO:0009851], auxin metabolic process [GO:0009850]</b>            |                     |                                            |                                     |                               |                                 |
| Solyc09g064160.3                                                                                | 3.815015            | <i>Flavin-containing monooxygenase</i>     | <i>Solyc09g064160</i>               | AT4G28720                     | <i>YUC8</i>                     |
| Solyc05g006220.3                                                                                | -1.77763            | <i>IAA-amino acid hydrolase</i>            | <i>Solyc05g006220</i>               | AT1G51760                     | <i>IAR3</i>                     |
| Solyc05g006220.4                                                                                | 0.844649            | <i>IAA-amino acid hydrolase</i>            | <i>Solyc05g006220</i>               | AT1G51760                     | <i>IAR3</i>                     |
| Solyc05g006220.5                                                                                | 0.988377            | <i>IAA-amino acid hydrolase</i>            | <i>Solyc05g006220</i>               | AT1G51760                     | <i>IAR3</i>                     |
| <b>auxin polar transport [GO:0009926], auxin export across the plasma membrane [GO:0010315]</b> |                     |                                            |                                     |                               |                                 |
| Solyc02g089263.1                                                                                | -0.93593            | <i>Auxin transport protein BIG</i>         | <i>Solyc02g089263</i>               | AT3G02260                     | <i>TIR3</i>                     |
| Solyc05g026140.3                                                                                | -0.70524            | <i>Uncharacterized protein</i>             | <i>Solyc05g026140</i>               | AT2G31190                     | <i>RUS2</i>                     |
| Solyc01g099120.3                                                                                | 0.65156             | <i>Auxin response 4</i>                    | <i>AXR4</i>                         | AT1G54990                     | <i>AXR4</i>                     |
| Solyc03g118740.3                                                                                | 0.89916             | <i>Auxin efflux facilitator</i>            | <i>PIN1</i>                         | AT1G73590                     | <i>PIN1</i>                     |
| Solyc10g078370.2                                                                                | -0.90325            | <i>Auxin efflux facilitator</i>            | <i>PIN9</i>                         | AT1G73590                     | <i>PIN1</i>                     |
| <b>auxin-activated signaling pathway [GO:0009734], response to auxin [GO:0009733]</b>           |                     |                                            |                                     |                               |                                 |
| Solyc03g114480.3                                                                                | -2.84071            | <i>Tetraspanin-8</i>                       | <i>Solyc03g114480</i>               | AT4G28050                     | <i>TET7</i>                     |
| Solyc04g076850.3                                                                                | -1.35286            | <i>Entire</i>                              | <i>E</i>                            | AT5G65670                     | <i>IAA9</i>                     |
| Solyc11g072480.2                                                                                | 2.37454             | <i>Tetraspanin-3</i>                       | <i>Solyc11g072480</i>               | AT3G45600                     | <i>TET3</i>                     |
| Solyc02g082450.3                                                                                | -1.34272            | <i>Auxin efflux facilitator</i>            | <i>Solyc02g082450</i>               | AT2G17500                     | <i>PIN-likes5</i>               |
| Solyc02g079190.3                                                                                | -1.09298            | <i>Auxin F-box protein 5</i>               | <i>Solyc02g079190</i>               | AT3G62980                     | <i>TIR1</i>                     |
| Solyc03g059390.3                                                                                | -1.42873            | <i>Tetraspanin-2</i>                       | <i>TET2</i>                         | AT2G19580                     | <i>TET2</i>                     |
| Solyc01g096070.3                                                                                | -1.18782            | <i>Auxin response factor 18</i>            | <i>ARF18</i>                        | AT4G23980                     | <i>ARF9</i>                     |
| Solyc04g049080.3                                                                                | -1.11164            | <i>Tetraspanin-6</i>                       | <i>Solyc04g049080</i>               | AT4G23410                     | <i>TET5</i>                     |
| Solyc02g077560.3                                                                                | -0.85503            | <i>Auxin response factor 3</i>             | <i>Solyc04g049080</i>               | AT2G33860                     | <i>ARF3</i>                     |
| Solyc12g042075.1                                                                                | -0.77682            | <i>Auxin-response factor</i>               | <i>Solyc12g042075</i>               | AT5G62000                     | <i>ARF2</i>                     |
| Solyc03g120380.3                                                                                | 1.30301             | <i>Auxin-regulated IAA19</i>               | <i>IAA19</i>                        | AT3G15540                     | <i>IAA19</i>                    |
| Solyc04g082830.3                                                                                | -1.85963            | <i>Auxin efflux carrier family protein</i> | <i>Solyc04g082830</i>               | AT1G20925                     | <i>PIN-likes1</i>               |
| Solyc02g037550.3                                                                                | -1.54635            | <i>Auxin efflux carrier family protein</i> | <i>Solyc02g037550</i>               | AT1G76520                     | <i>PIN-likes3</i>               |
| Solyc03g031990.3                                                                                | -0.89102            | <i>Auxin efflux carrier family protein</i> | <i>Solyc03g031990</i>               | AT1G76520                     | <i>PIN-likes3</i>               |
| Solyc02g091240.1                                                                                | -0.76972            | <i>Auxin efflux carrier family protein</i> | <i>Solyc02g091240</i>               | AT1G71090                     | <i>PIN-likes2</i>               |
| Solyc11g069500.2                                                                                | -0.71450            | <i>Auxin response factor 10A</i>           | <i>ARF10A</i>                       | AT2G28350                     | <i>ARF10</i>                    |
| Solyc06g075360.3                                                                                | 1.14777             | <i>Tetraspanin-3-like</i>                  | <i>Solyc06g075360</i>               | AT3G45600                     | <i>TET3</i>                     |
| Solyc12g007230.2                                                                                | -0.77621            | <i>Auxin-regulated IAA8</i>                | <i>IAA8</i>                         | AT4G29080                     | <i>IAA27</i>                    |
| Solyc08g082630.3                                                                                | -1.12841            | <i>Auxin response factor 9A</i>            | <i>ARF9A</i>                        | AT4G23980                     | <i>ARF9</i>                     |
| Solyc07g025510.3                                                                                | -0.74116            | <i>Senescence-associated protein</i>       | <i>Solyc07g025510</i>               | AT2G19580                     | <i>TET2</i>                     |

|                  |          |                                              |                       |           |                 |
|------------------|----------|----------------------------------------------|-----------------------|-----------|-----------------|
| Solyc06g053840.3 | -0,74270 | <i>Auxin-regulated IAA4</i>                  | <i>IAA4</i>           | AT5G43700 | <i>IAA4</i>     |
| Solyc08g080730.3 | -0.94883 | <i>Tetraspanin-10</i>                        | <i>Solyc08g080730</i> | AT1G56700 | <i>TET10</i>    |
| Solyc03g116100.3 | -2.08677 | <i>R2R3MYB transcription factor 31</i>       | <i>MYB31</i>          | AT5g62470 | <i>MYB5</i>     |
| Solyc07g014620.1 | -2.55421 | <i>Small auxin up-regulated RNA63</i>        | <i>SAUR63</i>         | AT5G20810 | <i>SAUR70</i>   |
| Solyc06g053260.1 | -1.29932 | <i>Small auxin up-regulated RNA 58</i>       | <i>SAUR58</i>         | AT4G00880 | <i>SAUR31</i>   |
| Solyc02g067340.3 | 1.44044  | <i>R2R3MYB transcription factor 96</i>       | <i>THM6</i>           | AT3G47600 | <i>MYB94</i>    |
| Solyc01g110680.3 | -1.33216 | <i>Small auxin up-regulated RNA12</i>        | <i>SAUR12</i>         | AT2G21210 | <i>SAUR6</i>    |
| Solyc02g087960.3 | 2.57066  | <i>R2R3MYB transcription factor 94</i>       | <i>MYB94</i>          | AT3G47600 | <i>MYB94</i>    |
| Solyc11g011660.2 | 1.46882  | <i>Auxin-induced SAUR</i>                    | <i>Solyc11g011660</i> | AT1G29500 | <i>SAUR66</i>   |
| Solyc10g083320.2 | 3.74462  | <i>Small auxin up-regulated RNA82</i>        | <i>SAUR82</i>         | AT2G36210 | <i>SAUR45</i>   |
| Solyc01g111000.3 | -1.42006 | <i>Auxin-induced SAUR-like</i>               | <i>Solyc01g111000</i> | AT4G38840 | <i>SAUR14</i>   |
| Solyc01g096340.3 | -0.72682 | <i>Small auxin up-regulated RNA2</i>         | <i>SAUR2</i>          | AT3G61900 | <i>SAUR33</i>   |
| Solyc04g052970.2 | 1.98848  | <i>Auxin-induced SAUR-like</i>               | <i>Solyc04g052970</i> | AT5G18030 | <i>SAUR21</i>   |
| Solyc01g110560.3 | -1.02335 | <i>Small auxin up-regulated RNA3</i>         | <i>SAUR3</i>          | AT4G34750 | <i>SAUR49</i>   |
| Solyc01g110940.3 | 1.27774  | <i>Auxin-induced SAUR-like</i>               | <i>Solyc01g110940</i> | AT4G38840 | <i>SAUR14</i>   |
| Solyc01g110590.3 | 1.23355  | <i>Small auxin up-regulated RNA6</i>         | <i>SAUR6</i>          | AT4G34760 | <i>SAUR50</i>   |
| Solyc04g078900.3 | 0.95678  | <i>Abscisic acid 8'-hydroxylase CYP707A1</i> | <i>CYP707A1</i>       | AT3G19270 | <i>CYP707A4</i> |
| Solyc04g053000.1 | 1.33901  | <i>Auxin-induced SAUR-like</i>               | <i>Solyc04g053000</i> | AT5G18030 | <i>SAUR21</i>   |
| Solyc06g053290.1 | -0.73484 | <i>Small auxin up-regulated RNA59</i>        | <i>SAUR59</i>         | AT2G46690 | <i>SAUR32</i>   |

353  
354  
355

**Table S3.** Tomato DEGs involved in gibberellin signalling (included in the KEGG ID: sly04075) and biosynthesis (included in the KEGG ID: sly01110) as retrieved from KEGG maps after the enrichment analysis.

| Gene ID              | log <sub>2</sub> FC | ITAG 3.0 annotation                   | <i>S. lycopersicum</i><br>gene acronym | <i>A. thaliana</i><br>orthologue | <i>A. thaliana</i><br>gene<br>acronym |
|----------------------|---------------------|---------------------------------------|----------------------------------------|----------------------------------|---------------------------------------|
| <b>GA signalling</b> |                     |                                       |                                        |                                  |                                       |
| Solyc04g078390.2     | -0.72               | <i>F-box family protein</i>           | <i>SLY1</i>                            | AT4G24210                        | <i>SLY1 (GID2)</i>                    |
| Solyc01g098390.3     | -1.52               | <i>Gibberellin receptor GID1A</i>     | <i>GID1a</i>                           | AT5G27320                        | <i>GID1C</i>                          |
| Solyc09g074270.3     | -1.57               | <i>Gid1-like gibberellin receptor</i> | <i>GID1b1</i>                          | AT3G63010                        | <i>GID1B</i>                          |
| Solyc01g102300.3     | -2.81               | <i>bHLH transcription factor 006</i>  | <i>PIF3</i>                            | AT1G09530                        | <i>PIF3</i>                           |
| <b>GA metabolism</b> |                     |                                       |                                        |                                  |                                       |
| Solyc03g119910.3     | 3.64                | <i>Le3OH-23b-hydroxylase</i>          | <i>GA3ox-2</i>                         | AT1G15550                        | <i>GA3OX1</i>                         |
| Solyc06g035530.3     | 2.70                | <i>Gibberellin 20-oxidase-2</i>       | <i>GA20ox-2</i>                        | AT4G25420                        | <i>GA20OX1</i>                        |
| Solyc07g056670.3     | 2.60                | <i>Gibberellin 2-oxidase 2</i>        | <i>GA2ox-2</i>                         | AT1G78440                        | <i>GA2OX1</i>                         |
| Solyc01g079200.3     | 2.29                | <i>Gibberellin 2-oxidase 3</i>        | <i>GA2ox-3</i>                         | AT1G02400                        | <i>GA2OX6</i>                         |
| Solyc07g066675.1     | -1.30               | <i>Ent-kaurene synthase</i>           | <i>TPS24 (KS)</i>                      | AT1G79460                        | <i>GA2</i>                            |
| Solyc07g066670.3     | -1.62               | <i>Ent-kaurene synthase</i>           | <i>TPS24 (KS)</i>                      | AT1G79460                        | <i>GA2</i>                            |
| Solyc07g061720.3     | -2.12               | <i>Gibberellin 2-oxidase-4</i>        | <i>GA2ox-4</i>                         | AT1G78440                        | <i>GA2OX1</i>                         |
| Solyc04g083160.2     | -2.44               | <i>Cytochrome P450</i>                | <i>KO</i>                              | AT5G25900                        | <i>KO</i>                             |
| Solyc06g084240.2     | -4.09               | <i>Copalyl diphosphate synthase</i>   | <i>TPS40 (CPS)</i>                     | AT4G02780                        | <i>GA1</i>                            |

356  
357

358 **Table S4.** Expressed genes passing quality checks, trimming and FPKM filtering in 3  
 359 independent replicates of wild-type *Solanum lycopersicum* M82 (wt) or CCD7-silenced leaves  
 360 in the same background (SL-). SL 3.0: *Solanum lycopersicum* (tomato) genome assembly  
 361 SL3.0 from the Solanaceae Genomics Project.

| Sample | No. of clean reads x 10 <sup>6</sup> | Aligned reads on SL 3.0 (%) | No. of expressed transcripts |
|--------|--------------------------------------|-----------------------------|------------------------------|
| wt_1   | 47.29                                | 85.45                       | 18791                        |
| wt_2   | 42.92                                | 84.64                       | 18615                        |
| wt_3   | 31.63                                | 85.40                       | 19048                        |
| SL-_1  | 32.06                                | 85.25                       | 18702                        |
| SL-_2  | 36.99                                | 86.75                       | 18261                        |
| SL-_3  | 39.09                                | 86.96                       | 18626                        |

362  
 363  
 364

365 **Table S5.** List of primers used in this work, with target gene names.

| <b>primer/<br/>target</b>      | <b>sequence</b>                                                   | <b>reference</b> |
|--------------------------------|-------------------------------------------------------------------|------------------|
| <i>ACT</i>                     | 5'-TCCCAGGTATTGCTGATAGAA-3'<br>5'-TGAGGGAAGCCAAGATAGAG -3'        | (43)             |
| <i>AN</i>                      | 5'-CCATAATCCCCTGCCTCCA-3'<br>5'-TCCCCTGTACATGCACCATT-3'           | This work        |
| <i>AP1/MC</i>                  | 5'-CGAGAAAGAACCAACTCATGC-3'<br>5'-TAGTTTGCTGGTGCCATTCA-3'         | (44)             |
| <i>ARF5</i>                    | 5'-ATTAGTTCTGAGTTGTGGC-3'<br>5'-GGTATCTGTGAAGTTGCTG-3'            | (45)             |
| <i>DOF9</i>                    | 5'-ATGGTGCTGGAGCGAGTATG-3'<br>5'-GCGTAGAAATAGCAAGATCTGGGA-3'      | This work        |
| <i>DST</i>                     | 5'-TTTGCCTGTGGAGAGGAGAGGAAA-3'<br>5'-ACTCAACGCGCAGAACGTAACGAT-3'  | This work        |
| <i>EF-1<math>\alpha</math></i> | 5'-CTCCATTGGGTCTG TTTTGCT-3'<br>5'-GGTCACCTTGGC ACCAGTTG-3'       | (46)             |
| <i>FA</i>                      | 5'-AGGGGAAGAGGATGAGGAAA-3'<br>5'-GATGCTCCCTTTGTCTCTCG-3'          | (44)             |
| <i>FUL1</i>                    | 5'-GTTTTGCCACAACAACCTGGACTC-3'<br>5'-CTTGCTGCTGTGAAGAACTACC-3'    | (47)             |
| <i>GA20ox2</i>                 | 5'-TTTCCATATTCTACCCTACAAG -3'<br>5'-TCATCGCATTACAATACTCTT -3'     | (48)             |
| <i>GA2ox4</i>                  | 5'-CCAACAACACTTCCGGTCTT-3'<br>5'-CATTCGTCATCACCTGTAATGAG-3'       | (49)             |
| <i>GA3ox2</i>                  | 5'-GATCATAAATTTGTCATGGATAC -3'<br>5'-TGTTTCCATATGGTTAAGTAATCG -3' | (50)             |
| <i>LA</i>                      | 5'-TGCAGCAGCTATTCGGTCAA-3'<br>5'-ACCCAGAGAATCCGCCTACT-3'          | (51)             |
| <i>LIN</i>                     | 5'-AGTGCCAAACAGGTACAATGTG-3'<br>5'-CCATTCAAAGCATCCATCCTGG-3'      | This work        |
| <i>MBP20</i>                   | 5'-CACATTCTCACCACCAACTTCCTAA-3'<br>5'-AGTGATGAGCCTGACCGGAT-3'     | (1)              |
| <i>SBP3</i>                    | 5'-CAAGTTGAACGGGCACCTAC-3'<br>5'-TGGCAAATGACAGAAGAGAGAG-3'        | (44)             |
| <i>SBP15</i>                   | 5'-GGTTCAGCTACCAGGACCAG-3'<br>5'-TGTGAACTTGGCTGTTGACC-3'          | (44)             |
| <i>SFT</i>                     | 5'-GTCACCGATATTCCAGCTACC-3'<br>5'-CATACACTGTTTGCCGACCTA-3'        | This work        |
| <i>snRU6</i>                   | 5'-GGGAACGATACAGAGAAGATTAGC-3'<br>5'-ACCATTCTCGATTTGTGCGT-3'      | (52)             |
| <i>SP5G</i>                    | 5'-CTAGCAACCCAAACCTGAGG-3'<br>5'-ATTGCCAAAGGTTGCTCCTG-3'          | This work        |

|                     |                                                                  |           |
|---------------------|------------------------------------------------------------------|-----------|
| <i>SP6A</i>         | 5'-TGGTCGTGTGATAGGTGAAGT-3'<br>5'-CTGTGACCAGCCAGTGTAGA-3'        | This work |
| <i>TR5</i>          | 5'-GCAGCGATCACAGAGGAATC-3'<br>5-TGGCTTCCTTCCATCAACCT-3'          | This work |
| <i>UF</i>           | 5'-CCCCGGTGGTTCTAAAATGG-3'<br>5'-TCAACTTGTTGAAAGGCATCGT-3'       | This work |
| <i>WOX9</i>         | 5'-TGCAGTCACAGCTCATGAGT-3'<br>5'-TCCCAACCTCAAAAGCAACG-3'         | This work |
| Stem-loop<br>miR156 | 5'-<br>GTCGTATCCAGTGCAGGGTCCGAGGTAT<br>TCGCACTGGATACGACGTGCTC-3' | (53)      |
| Mature<br>miR156    | 5'-GTCGTATCCAGTGCAGGGT-3'<br>5'-TTGACAGAAGATAGAGAGCACG-3'        | (52)      |
| Stem-loop<br>miR319 | 5'-<br>GTCGTATCCAGTGCAGGGTCCGAGGTAT<br>TCGCACTGGATACGAGGGAGC-3'  | (54)      |
| Mature<br>miR319    | 5'-GCGGCGTTGGACTGAAGGGT-3'<br>5'-GTGCAGGGTCCGAGG-3'              | (54)      |

366  
367



368  
369  
370  
371  
372  
373  
374  
375  
376

**Dataset S1** (separate file). Gene ontology categories for Biological Processes (BP-GO) enriched in strigolactone-depleted (SL-) tomato leaves in comparison to wt (FDR<0.05; log<sub>2</sub>FC >+0.7;<-0.7), obtained using the ShinyGO v0.61 Gene Ontology Enrichment Analysis tool.

**Dataset S2** (separate file). List of DEGs included in the GO category Reproduction (GO: 0000003).

**Dataset S3** (separate file). List of differentially expressed genes (DEGs) in the strigolactone-depleted (SL-) plants with respect to wt (padjust ≤ 0.05).

377  
378  
379

## SI References

- 380 1. X. Jiang *et al.*, *FRUITFULL-like* genes regulate flowering time and inflorescence  
381 architecture in tomato. *Plant Cell* **34**, 1002-1019 (2022).
- 382 2. R. Wang *et al.*, Re-evaluation of transcription factor function in tomato fruit  
383 development and ripening with CRISPR/Cas9-mutagenesis. *Sci. Rep.* **9**, 1696 (2019).
- 384 3. C. Périlleux, G. Lobet, P. Tocquin, Inflorescence development in tomato: gene  
385 functions within a zigzag model. *Front. Plant Sci.* **5**, 121 (2014).
- 386 4. E. Gimenez *et al.*, *TOMATO AGAMOUS1* and *ARLEQUIN/TOMATO AGAMOUS-LIKE1*  
387 *MADS*-box genes have redundant and divergent functions required for tomato  
388 reproductive development. *Plant Mol. Biol.* **91**, 513-531 (2016).
- 389 5. T. Yang, Y. He, S. Niu, S. Yan, Y. Zhang, Identification and characterization of the  
390 *CONSTANS (CO)/CONSTANS-like (COL)* genes related to photoperiodic signaling and  
391 flowering in tomato. *Plant Sci.* **301**, 110653 (2020).
- 392 6. X. Ma *et al.*, The NAC transcription factor *SINAP2* regulates leaf senescence and fruit  
393 yield in tomato. *Plant Physiol.* **177**, 1286-1302 (2018).
- 394 7. Y. Berger *et al.*, The NAC-domain transcription factor *GOBLET* specifies leaflet  
395 boundaries in compound tomato leaves. *Development* **136**, 823-832 (2009).
- 396 8. A. Hendelman, R. Stav, H. Zemach, T. Arazi, The tomato NAC transcription factor  
397 *SINAM2* is involved in flower-boundary morphogenesis. *J. Exp. Bot.* **64**, 5497-5507  
398 (2013).
- 399 9. C. Bendix, C. M. Marshall, F. G. Harmon, Circadian clock genes universally control key  
400 agricultural traits. *Mol. Plant* **8**, 1135-1152 (2015).
- 401 10. P. Facella *et al.*, Diurnal and circadian rhythms in the tomato transcriptome and their  
402 modulation by cryptochrome photoreceptors. *PLoS One* **3**, e2798 (2008).
- 403 11. Y. Tanigaki *et al.*, Transcriptome analysis of plant hormone-related tomato (*Solanum*  
404 *lycopersicum*) genes in a sunlight-type plant factory. *PLoS One* **10**, e0143412 (2015).
- 405 12. R. Schaffer *et al.*, The late elongated hypocotyl mutation of *Arabidopsis* disrupts  
406 circadian rhythms and the photoperiodic control of flowering. *Cell* **93**, 1219-1229  
407 (1998).
- 408 13. J. L. Prunedo-Paz, G. Breton, A. Para, S. A. Kay, A functional genomics approach  
409 reveals CHE as a component of the *Arabidopsis* circadian clock. *Science* **323**, 1481-  
410 1485 (2009).
- 411 14. X. W. Deng, T. Caspar, P. H. Quail, *COP1*: a regulatory locus involved in light-  
412 controlled development and gene expression in *Arabidopsis*. *Genes Dev.* **5**, 1172-  
413 1182 (1991).
- 414 15. S. Jang *et al.*, *Arabidopsis COP1* shapes the temporal pattern of CO accumulation  
415 conferring a photoperiodic flowering response. *EMBO J.* **27**, 1277-1288 (2008).
- 416 16. M. R. Doyle *et al.*, The *ELF4* gene controls circadian rhythms and flowering time in  
417 *Arabidopsis thaliana*. *Nature* **419**, 74-77 (2002).

- 418 17. J. W. Yu *et al.*, COP1 and ELF3 control circadian function and photoperiodic flowering  
419 by regulating GI stability. *Mol. Cell* **32**, 617-630 (2008).
- 420 18. Y. He, M. R. Doyle, R. M. Amasino, PAF1-complex-mediated histone methylation of  
421 *FLOWERING LOCUS C* chromatin is required for the vernalization-responsive, winter-  
422 annual habit in Arabidopsis. *Genes Dev.* **18**, 2774-2784 (2004).
- 423 19. C. Brandoli, C. Petri, M. Egea-Cortines, J. Weiss, Gigantea: uncovering new functions  
424 in flower development. *Genes* **11** (2020).
- 425 20. M. Y. Chung *et al.*, Ectopic expression of miRNA172 in tomato (*Solanum*  
426 *lycopersicum*) reveals novel function in fruit development through regulation of an  
427 AP2 transcription factor. *BMC Plant Biol.* **20**, 283 (2020).
- 428 21. X. Liu *et al.*, The NF-YC-RGL2 module integrates GA and ABA signalling to regulate  
429 seed germination in Arabidopsis. *Nat. Comm.* **7**, 12768 (2016).
- 430 22. B. B. Aklilu, R. S. Soderquist, K. M. Culligan, Genetic analysis of the Replication  
431 Protein A large subunit family in Arabidopsis reveals unique and overlapping roles in  
432 DNA repair, meiosis and DNA replication. *Nucleic Acids Res.* **42**, 3104-3118 (2014).
- 433 23. Y. Steinbach, L. Hennig, Arabidopsis MSI1 functions in photoperiodic flowering time  
434 control. *Front. Plant Sci.* **5**, 77 (2014).
- 435 24. Y. Z. Xu *et al.*, The chloroplast triggers developmental reprogramming when *MutS*  
436 *HOMOLOG1* is suppressed in plants. *Plant Physiol.* **159**, 710-720 (2012).
- 437 25. S. Sarma *et al.*, *MutS-Homolog2* silencing generates tetraploid meiocytes in tomato.  
438 *Plant Direct* **2**, e00017 (2018).
- 439 26. H. Saze, T. Kakutani, Heritable epigenetic mutation of a transposon-flanked  
440 Arabidopsis gene due to lack of the chromatin-remodeling factor DDM1. *EMBO J.* **26**,  
441 3641-3652 (2007).
- 442 27. C. Cosio *et al.*, The class III peroxidase PRX17 is a direct target of the MADS-box  
443 transcription factor AGAMOUS-LIKE15 (AGL15) and participates in lignified tissue  
444 formation. *New Phytol.* **213**, 250-263 (2017).
- 445 28. J. T. Vogel *et al.*, *SICCD7* controls strigolactone biosynthesis, shoot branching and  
446 mycorrhiza-induced apocarotenoid formation in tomato. *Plant J.* **61**, 300-311 (2010).
- 447 29. Y. Burko *et al.*, A role for APETALA1/fruitfull transcription factors in tomato leaf  
448 development. *Plant Cell* **25**, 2070-2083 (2013).
- 449 30. N. Ori *et al.*, Regulation of *LANCEOLATE* by miR319 is required for compound-leaf  
450 development in tomato. *Nat. Genet.* **39**, 787-791 (2007).
- 451 31. P. Pesaresi, C. Mizzotti, M. Colombo, M. Masiero, Genetic regulation and structural  
452 changes during tomato fruit development and ripening. *Front. Plant Sci.* **5**, 124  
453 (2014).
- 454 32. A. Mazzucato, A. Taddei, G. Soressi, The parthenocarpic fruit (*pat*) mutant of tomato  
455 (*Lycopersicon esculentum* Mill.) sets seedless fruits and has aberrant anther and  
456 ovule development. *Development* **125**, 107-114 (1998).
- 457 33. M. Pertea, D. Kim, G. M. Pertea, J. T. Leek, S. L. Salzberg, Transcript-level expression  
458 analysis of RNA-seq experiments with HISAT, StringTie and Ballgown. *Nat. Protoc.*  
459 **11**, 1650-1667 (2016).
- 460 34. S. Anders, P. T. Pyl, W. Huber, HTSeq--a Python framework to work with high-  
461 throughput sequencing data. *Bioinformatics* **31**, 166-169 (2015).
- 462 35. M. I. Love, W. Huber, S. Anders, Moderated estimation of fold change and dispersion  
463 for RNA-seq data with DESeq2. *Genome Biol.* **15**, 550 (2014).
- 464 36. M. Kanehisa, Enzyme annotation and metabolic reconstruction using KEGG.  
465 *Methods Mol. Biol.* **1611**, 135-145 (2017).
- 466 37. S. X. Ge, D. Jung, R. Yao, ShinyGO: a graphical gene-set enrichment tool for animals  
467 and plants. *Bioinformatics* **36**, 2628-2629 (2020).

- 468 38. T. Urbanová, D. Tarkowská, O. Novák, P. Hedden, M. Strnad, Analysis of gibberellins  
469 as free acids by ultra performance liquid chromatography-tandem mass  
470 spectrometry. *Talanta* **112**, 85-94 (2013).
- 471 39. D. Rittenberg, G. L. Foster, A new procedure for quantitative analysis by isotope  
472 dilution, with application to the determination of amino acids and fatty acids. *J. Biol.*  
473 *Chem.* **133**, 737-744 (1940).
- 474 40. C. Pagliarani *et al.*, The accumulation of miRNAs differentially modulated by drought  
475 stress is affected by grafting in grapevine. *Plant Physiol.* **173**, 2180-2195 (2017).
- 476 41. C. Everaert *et al.*, Benchmarking of RNA-sequencing analysis workflows using whole-  
477 transcriptome RT-qPCR expression data. *Sci. Rep.* **7**, 1559 (2017).
- 478 42. J. H. Zar, Spearman Rank Correlation: Overview. *Wiley StatsRef: Statistics Reference*  
479 *Online* <https://doi.org/10.1002/9781118445112.stat05964> (2014).
- 480 43. J. López-Ráez *et al.*, Does abscisic acid affect strigolactone biosynthesis? *New Phytol.*  
481 **187**, 343-354 (2010).
- 482 44. G. F. Ferreira e Silva *et al.*, MicroRNA156-targeted SPL/SBP box transcription factors  
483 regulate tomato ovary and fruit development. *Plant J.* **78**, 604-618 (2014).
- 484 45. S. Habib, M. Waseem, N. Li, L. Yang, Z. Li, Overexpression of *SlGRAS7* affects multiple  
485 behaviors leading to confer abiotic stresses tolerance and impacts gibberellin and  
486 auxin signaling in tomato. *Int. J. Genomics* **2019**, 4051981 (2019).
- 487 46. M. Digilio *et al.*, Molecular and chemical mechanisms involved in aphid resistance in  
488 cultivated tomato. *New Phytol.* **187**, 1089-1101 (2010).
- 489 47. M. Bemer *et al.*, The tomato FRUITFULL homologs TDR4/FUL1 and MBP7/FUL2  
490 regulate ethylene-independent aspects of fruit ripening. *Plant Cell* **24**, 4437-4451  
491 (2012).
- 492 48. Y. Chen *et al.*, Overexpression of bHLH95, a basic helix-loop-helix transcription  
493 factor family member, impacts trichome formation via regulating gibberellin  
494 biosynthesis in tomato *J. Exp. Bot.* **71**, 3450-3462 (2020).
- 495 49. O. Yanai, E. Shani, D. Russ, N. Ori, Gibberellin partly mediates LANCEOLATE activity in  
496 tomato. *Plant J.* **68**, 571-582 (2011).
- 497 50. S. Matsuo, K. Nanya, S. Imanishi, I. Honda, E. Goto, Effects of blue and red lights on  
498 gibberellin metabolism in tomato seedlings. *Hort. J.* **88**, 76-82 (2019).
- 499 51. G. F. F. Silva *et al.*, Tomato floral induction and flower development are orchestrated  
500 by the interplay between gibberellin and two unrelated microRNA-controlled  
501 modules. *New Phytol.* **221**, 1328-1344 (2019).
- 502 52. I. Visentin *et al.*, A novel strigolactone-miR156 module controls stomatal behaviour  
503 during drought recovery. *Plant Cell Environ.* **43**, 1613-1624 (2020).
- 504 53. C. Chen *et al.*, Real-time quantification of microRNAs by stem-loop RT-PCR *Nucleic*  
505 *Acids Res.* **33**, e179 (2005).
- 506 54. A. Zanca *et al.*, Identification and expression analysis of microRNAs and targets in  
507 the biofuel crop sugarcane. *BMC Plant Biol.* **10**, 260 (2010).
